# Supplementary material for: Fanconi Anemia germline variants as susceptibility factors in aplastic anemia, MDS and AML
Source: PubMed Central journal article supplement (PMC5788620; doi:10.18632/oncotarget.23328), 2017-12-16
Supplement: oncotarget-09-2050-s001.pdf [file oncotarget-09-2050-s001.pdf]

## Fanconi Anemia germline variants as susceptibility factors in aplastic anemia, MDS and AML

### SUPPLEMENTARY MATERIALS

**Supplementary Table 1: List of genes selected to be sequenced in the project. All coding frames, excluding 5' and 3' UTR were selected.** See Supplementary\_Table\_1

**Supplementary Table 2: Summary table with all detected variants listed, stratified by individual patients. Functional and location data presented in each column.** The predicted function of the variants is indicated as D: damaging; N, neutral; T, tolerated; P, probably damaging; M, medium damaging; L, low damaging, A, disease automatic. See Supplementary\_Table\_2

**Supplementary Table 3: Previously reported variants, with their respective initial frequencies, for *TERT* gene and their current reported frequencies in publicly available database (Exac database)**

| Gene | Variant    | Exac_all_database | Previously published                                                |
|------|------------|-------------------|---------------------------------------------------------------------|
| TERT | Ala1062Thr | 2.500%            | Calado 2011 (2.6% <i>N</i> = 5), Yamaguchi 2005 (2.5% <i>N</i> = 5) |
| TERT | Pro530Leu  | 0.002%            | Calado 2011 (0.4% <i>N</i> = 1)                                     |
| TERT | Ala202Thr  | 0.060%            | Yamaguchi 2005 (1% <i>N</i> = 2)                                    |
| TERT | His412Tyr  | 1.200%            | Yamaguchi 2005 (1% <i>N</i> = 2), Calado 2009 (0.5% <i>N</i> = 1)   |
| TERT | Val1090Met | 0.001%            | Yamaguchi 2005 (1% <i>N</i> = 2)                                    |
| TERT | Val299Met  | 0.010%            | Calado 2009 (0.5% <i>N</i> = 1)                                     |

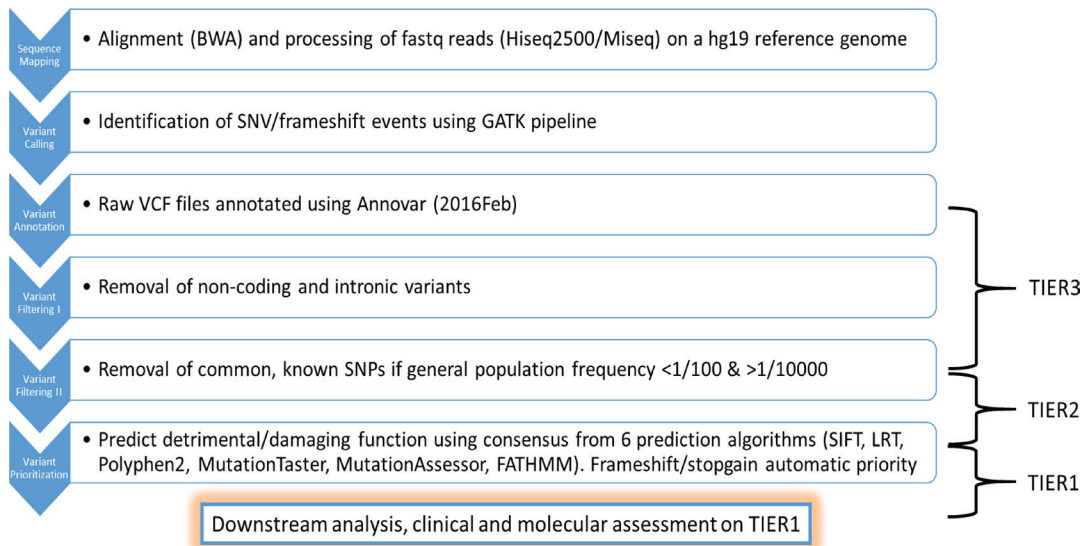

**Supplementary Figure 1: Analytical pipeline used to prioritize germline, damaging variants.**

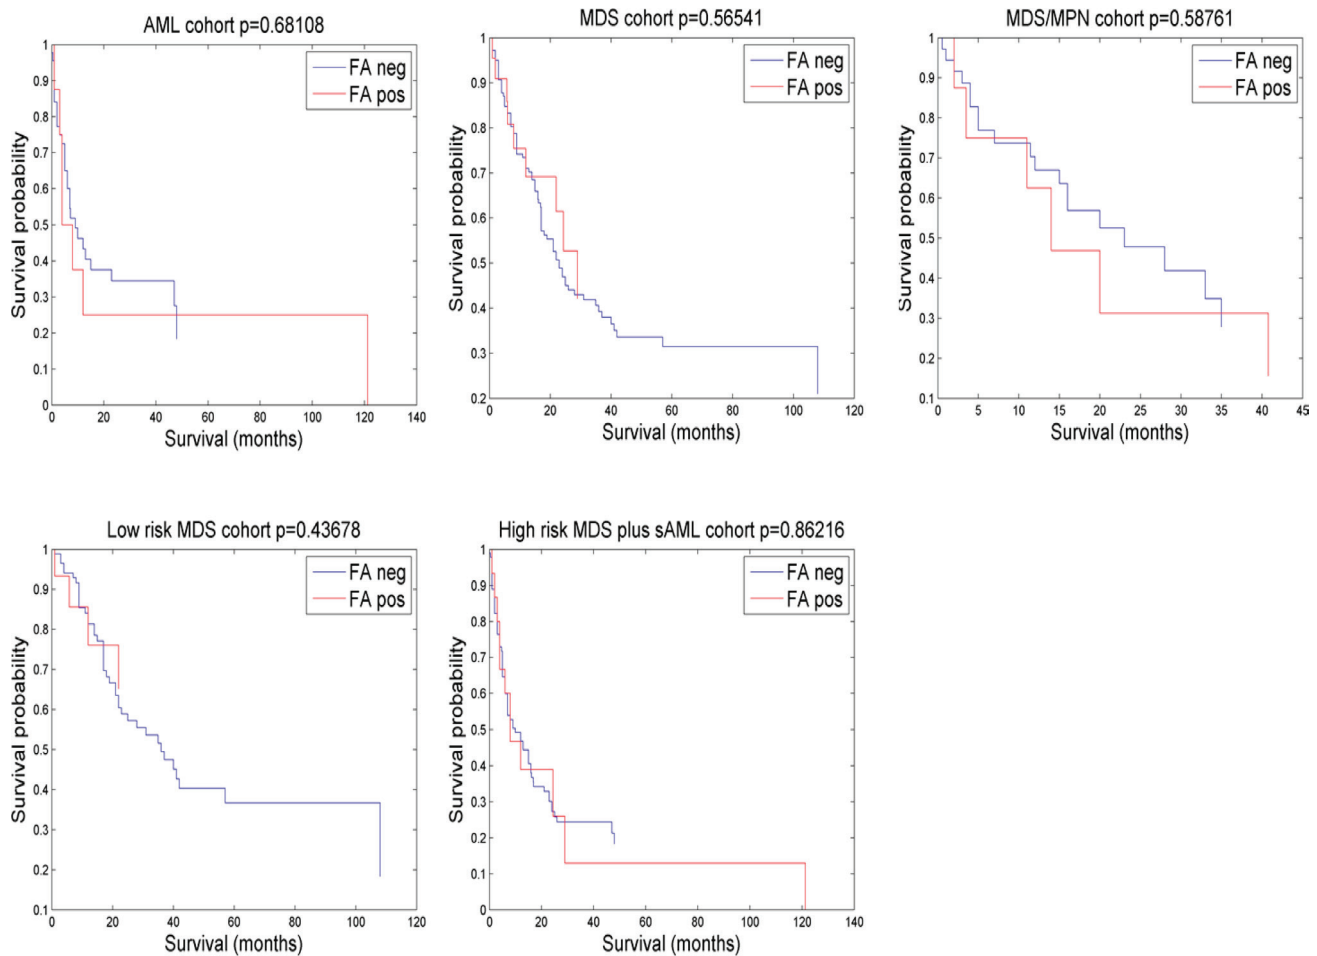

**Supplementary Figure 2: Kaplan-Meier plots show the survival of patients positive for FA variants.** Red line represents the survival curve for FA carriers, while blue line represents the survival curve for non-FA carriers. Each subgroup tested is indicated on top of each survival plot.

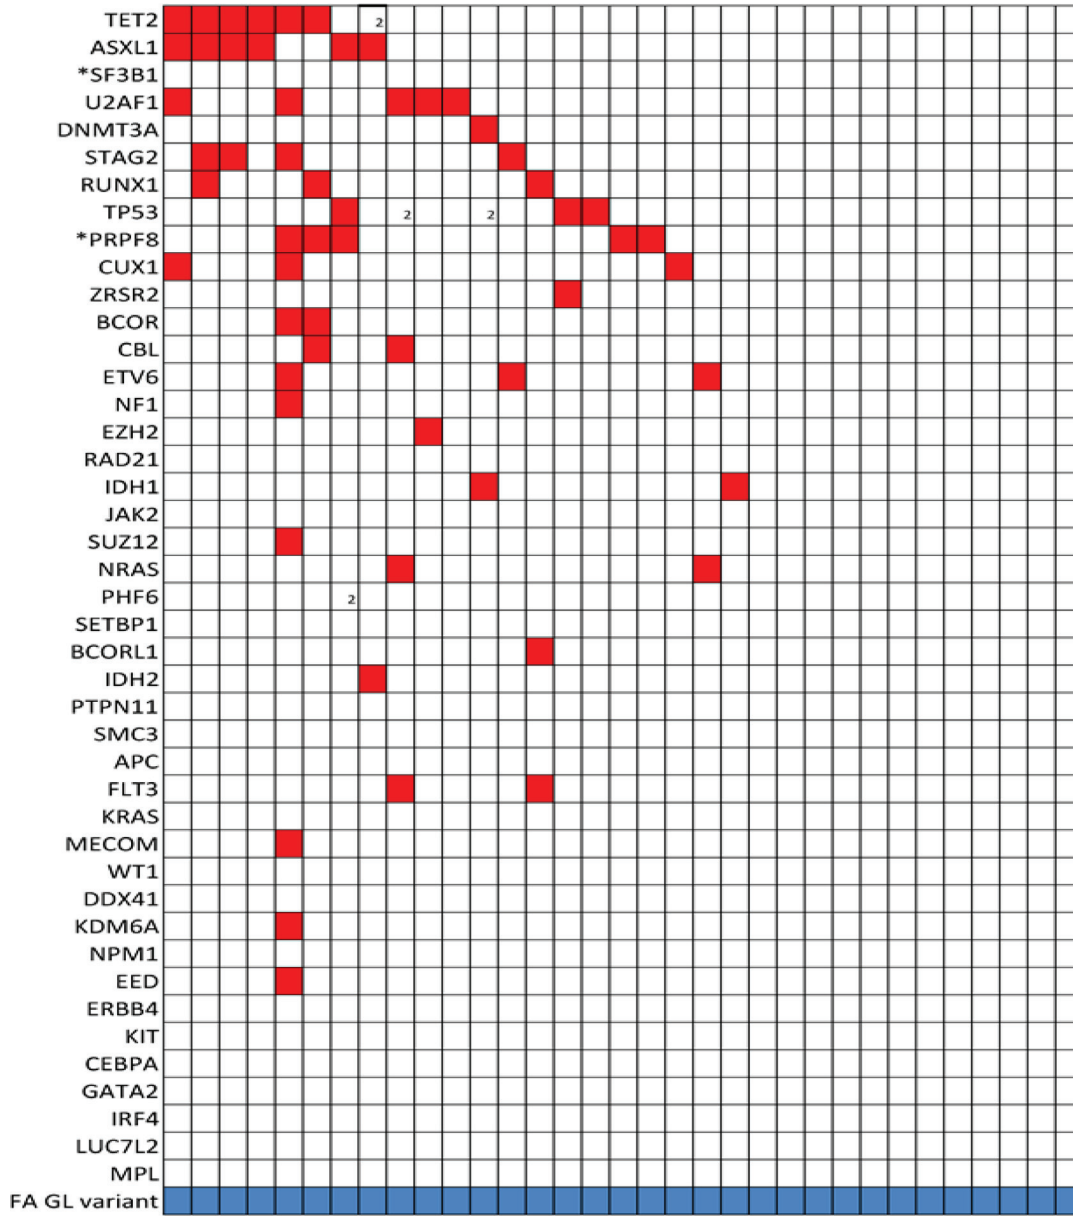

**Supplementary Figure 3: Somatic landscape of patients positive for FA variants.** Data for each patient is represented by columns of the matrix, rows represent each gene and its respective mutations. Red color represents patients positive for a somatic mutation within given gene. Numerical symbol "2" represents somatic deletion of the locus.

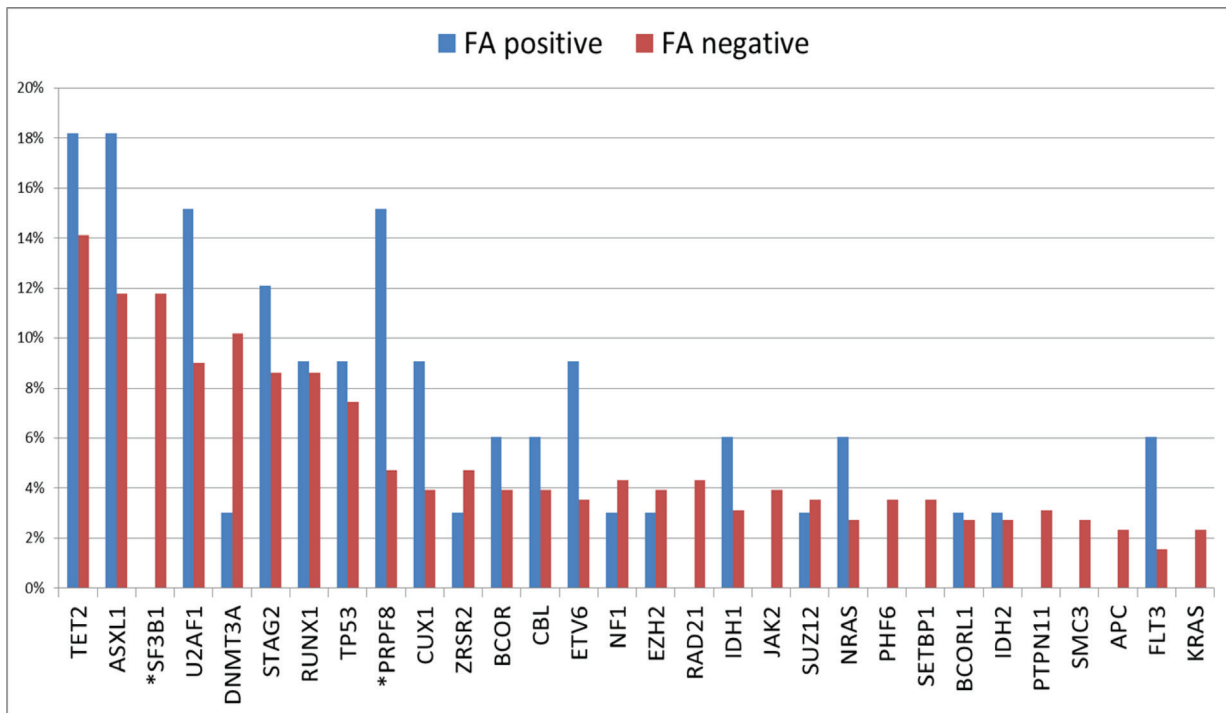

**Supplementary Figure 4: Frequencies of somatic mutations between FA positive and FA negative patients.** Height of the bar indicates frequency of somatic events for a given gene. Red color indicates frequency for non-FA carriers, blue represents FA carriers. Asterisk denotes significant difference between FA and non-FA (using Fisher's Exact test).
